# Supplementary material
Source: PubMed Central journal article supplement (PMC9113735)
Supplement: NIHMS1774084-supplement-Appendix_Tables.pdf [file NIHMS1774084-supplement-Appendix_Tables.pdf]

## Appendix

**Appendix Table 1.** Manual review key (chart review inclusion/exclusion criteria) to determine asthma labels.

| <b>RULES</b>                                                                                                                                                                                |                                                                                                                                                                                                                                                                                                                                                                                                                                                  |
|---------------------------------------------------------------------------------------------------------------------------------------------------------------------------------------------|--------------------------------------------------------------------------------------------------------------------------------------------------------------------------------------------------------------------------------------------------------------------------------------------------------------------------------------------------------------------------------------------------------------------------------------------------|
| <p><b>Must meet A1 criteria</b><br/> AND<br/> <b>A2 criteria OR A3 criteria (AND ≥1 of B; criteria other than medication if A2 used)</b><br/> AND<br/> <b>No criteria C (exclusion)</b></p> |                                                                                                                                                                                                                                                                                                                                                                                                                                                  |
| <b>A. DIAGNOSTIC FEATURE</b>                                                                                                                                                                | <b>CRITERIA FOR MAKING THE DIAGNOSIS OF ASTHMA</b>                                                                                                                                                                                                                                                                                                                                                                                               |
| <b>A1. History of variable respiratory symptoms</b>                                                                                                                                         |                                                                                                                                                                                                                                                                                                                                                                                                                                                  |
| <p>Wheeze, shortness of breath, chest tightness, cough<br/> Note: may vary by age, across cultures (e.g. heavy breathing)</p>                                                               | <p>More than 1 episode over time AND at least 1 of the following:</p> <ul style="list-style-type: none"> <li>- Symptoms vary over time</li> <li>- Symptoms vary in intensity</li> <li>- Symptoms worse at night or on waking</li> <li>- Symptoms often have clear trigger: exercise, illness, allergens, cold air, seasonal, emotion, smoke/fumes/smells, menstrual cycle, etc.</li> <li>- Symptoms often worse with viral infections</li> </ul> |
| <b>A2. Confirmed variable expiratory airflow limitation</b>                                                                                                                                 |                                                                                                                                                                                                                                                                                                                                                                                                                                                  |
| <p>Documented variability in lung function (one or more of a-f below)<br/> AND<br/> Documented airflow limitation (At least once FEV1/FVC is &lt;0.90)</p>                                  | <p>The greater the variation or frequency of occurrence, the more confident the diagnosis</p>                                                                                                                                                                                                                                                                                                                                                    |
| a) Positive bronchodilator (BD) response test                                                                                                                                               | Increase in FEV1 of 12% or 10% predicted                                                                                                                                                                                                                                                                                                                                                                                                         |
| b) Excessive variability in BID PEF measurements over 2 weeks                                                                                                                               | Average daily diurnal PEF variability >13%                                                                                                                                                                                                                                                                                                                                                                                                       |
| c) Increase in lung function after 4 weeks of anti-inflammatory treatment                                                                                                                   | Increase in FEV1 by 12% and >200 mL (or PEF by >20%) from baseline, outside of respiratory infections                                                                                                                                                                                                                                                                                                                                            |
| d) Positive exercise challenge test                                                                                                                                                         | Fall in FEV1 of >12% predicted, or PEF >15%                                                                                                                                                                                                                                                                                                                                                                                                      |
| e) Positive bronchial challenge test (usually only in older teens, adults)                                                                                                                  | Fall in FEV1 from baseline of ≥20% with standard doses of methacholine or histamine, or ≥15% with standardized hyperventilation, hypertonic saline or mannitol challenge                                                                                                                                                                                                                                                                         |
| f) Excessive variation in lung function between visits                                                                                                                                      | Variation in FEV1 of >12% in FEV1 or >15% in PEF between visits (may include respiratory infections)                                                                                                                                                                                                                                                                                                                                             |
| <b>A3. Documented clinical response to bronchodilator (typically if unable to perform PFTs or no PFTs available)</b>                                                                        |                                                                                                                                                                                                                                                                                                                                                                                                                                                  |

|                                                                        |                                                                                                                                                                                                                                                                                                              |
|------------------------------------------------------------------------|--------------------------------------------------------------------------------------------------------------------------------------------------------------------------------------------------------------------------------------------------------------------------------------------------------------|
| Documented clinical response to bronchodilators, oral/inhaled steroids | Clinical symptoms (cough/wheeze/shortness of breath, etc.) improve/resolve                                                                                                                                                                                                                                   |
| <b>B. DIAGNOSTIC FEATURE (SECONDARY)</b>                               | <b>CRITERIA SUPPORTIVE OF ASTHMA</b>                                                                                                                                                                                                                                                                         |
| 1. Personal history                                                    | <ul style="list-style-type: none"> <li>- Allergies (food or environmental)</li> <li>- Eczema</li> </ul> NOT asthma if: chronic production of sputum, Shortness of breath with dizziness, light-headedness, or peripheral tingling (paresthesia), chest pain, exercise-induced dyspnea with noisy inspiration |
| 2. Family history                                                      | Parent with asthma                                                                                                                                                                                                                                                                                           |
| 3. Physical exam                                                       | <ul style="list-style-type: none"> <li>- Expiratory wheeze on auscultation, prolonged expiratory phase</li> <li>- Nasal polyposis (allergies, but also CF) but lacking wheeze does not exclude diagnosis</li> <li>Eczema</li> </ul> NOT asthma if: crackles or digital clubbing                              |
| 4. Radiologic findings                                                 | Hyperinflation, flattened diaphragms, peribronchial thickening, right middle lobe syndrome in children under 5 years old                                                                                                                                                                                     |
| 5. Elevated FeNO                                                       | <ul style="list-style-type: none"> <li>- Decreases as ICS are started</li> <li>- &gt;25 PPB</li> </ul>                                                                                                                                                                                                       |
| 6. Labs                                                                | <ul style="list-style-type: none"> <li>- Blood eosinophilia &gt;300/ul or &gt;4%</li> <li>- IgE &gt;100</li> </ul>                                                                                                                                                                                           |
| 7. Medication                                                          | See list                                                                                                                                                                                                                                                                                                     |
| <b>C. EXCLUSION CRITERIA/ALTERNATIVE DIAGNOSES - Condition</b>         | <b>SYMPTOMS/RESPIRATORY ISSUES</b>                                                                                                                                                                                                                                                                           |
| Airways malacia                                                        | Inspiratory and expiratory wheeze, not helped or worsened with beta-agonist                                                                                                                                                                                                                                  |
| Airway tumor                                                           | Fixed obstruction, abnormal chest X-ray                                                                                                                                                                                                                                                                      |
| Autoimmune disease                                                     | Interstitial lung disease                                                                                                                                                                                                                                                                                    |
| Bronchiectasis                                                         | Recurrent infections, productive cough                                                                                                                                                                                                                                                                       |
| Cancers of the airway, chest, lung                                     | Persistent symptoms, pulmonary side effects of chemotherapy, dyspnea                                                                                                                                                                                                                                         |
| Cancers of blood, lymphatic system                                     | Pulmonary side effects of chemotherapy, dyspnea                                                                                                                                                                                                                                                              |
| Central airway obstruction                                             | Dyspnea, unresponsive to bronchodilators                                                                                                                                                                                                                                                                     |
| Congenital airway abnormality                                          | Persistent symptoms, dyspnea, cough                                                                                                                                                                                                                                                                          |
| Congenital heart disease/ CHF/ pulmonary edema                         | Cardiac murmur, hepatomegaly, crackles                                                                                                                                                                                                                                                                       |
| Cystic fibrosis                                                        | Excessive cough and mucus production, failure to thrive, gastrointestinal symptoms                                                                                                                                                                                                                           |
| Diaphragm disorder                                                     | Dyspnea                                                                                                                                                                                                                                                                                                      |

|                                           |                                                                                           |
|-------------------------------------------|-------------------------------------------------------------------------------------------|
| Hyperventilation, dysfunctional breathing | Dizziness, paresthesia, sighing                                                           |
| Immunodeficiency (acquired or congenital) | Recurrent infections, bronchiectasis                                                      |
| Inhaled foreign body                      | Sudden onset of symptoms, unilateral wheeze, symptoms do not respond to asthma medication |
| Interstitial/parenchymal lung disease     | Dyspnea, non-productive cough, finger clubbing                                            |
| Neuromuscular disease                     | Hypotonia, ineffective airway clearance                                                   |
| Post-radiation lung disease               | Dyspnea, interstitial lung disease                                                        |
| Post-transplant                           | Immunocompromised, recurrent infections                                                   |
| Primary ciliary dyskinesia                | Recurrent infections, productive cough, sinusitis                                         |
| Pulmonary aspiration                      | Dysphagia, coughing when eating, hypotonia                                                |
| Pulmonary embolism                        | Dyspnea, chest pain                                                                       |
| Pulmonary fibrosis                        | Hypoxemia at rest, crackles on exam, poor growth                                          |
| Pulmonary hypertension                    | Dyspnea                                                                                   |
| Vascular ring/sling                       | Fixed obstruction, no response to beta-agonist                                            |
| Vocal cord dysfunction                    | Dyspnea, inspiratory wheeze (stridor)                                                     |

FEV1= forced expiratory volume in 1 second, FVC=forced vital capacity, PEF=peak expiratory flow, PFT=pulmonary function test, FeNO=fractional exhaled nitric oxide, ICS=inhaled corticosteroid, IgE=immunoglobulin E

**Appendix Table 2. Asthma Medications**

| <b>Asthma Medications</b>   |                                                                                                                                                                                                                                                                                                                                                                                                                                                                                                                                  |
|-----------------------------|----------------------------------------------------------------------------------------------------------------------------------------------------------------------------------------------------------------------------------------------------------------------------------------------------------------------------------------------------------------------------------------------------------------------------------------------------------------------------------------------------------------------------------|
| Short-acting Beta-agonist   | <p><b>Route: Inhaled, nebulized, oral (PO)</b><br/>                     Albuterol (Albuterol, Albuterol Sulfate, Ventolin, Proventil, ProAir, Accuneb, VoSpire ER)<br/>                     Levalbuterol (Xopenex HFA)<br/>                     Metaproterenol (Alupent)<br/>                     Pirbuterol (Maxair)<br/>                     Terbutaline (Brethine)</p>                                                                                                                                                        |
| Long acting Beta-agonist    | <p><b>Route: Inhaled, nebulized</b><br/>                     Aformoterol (Brovana)<br/>                     Formoterol (Foradil)<br/>                     Indacaterol (Arcapta)<br/>                     Salmeterol (Serevent)</p>                                                                                                                                                                                                                                                                                               |
| Combination Bronchodilators | <p><b>Route: Inhaled, nebulized</b><br/>                     Albuterol+ipratropium (Combivent MDI , Respimat, Duoneb)<br/>                     Umeclidinium + vilanterol (Anoro Ellipta)</p>                                                                                                                                                                                                                                                                                                                                     |
| Methylxanthines             | <p><b>Route: oral (PO), intravenous (IV)</b><br/>                     Aminophylline<br/>                     Theophylline (Slo-Bid, Theo, Theodur, Theolair, Uniphyll)</p>                                                                                                                                                                                                                                                                                                                                                       |
| Anticholinergic Agents      | <p><b>Route: Inhaled</b><br/>                     Aclidinium bromide (Turdoza Pressair)<br/>                     Ipratropium bromide (Atrovent)<br/>                     Tiotropium bromide (Spiriva HandiHaler, Respimat)<br/>                     Umeclidinium bromide (Incruse Ellipta)</p>                                                                                                                                                                                                                                   |
| Combination bronchodilators | <p><b>Route: Inhaled, nebulized</b><br/>                     Albuterol+ipratropium (Combivent, Respimat, DuoNeb)<br/>                     Umeclidinium+vilanterol (Anoro Ellipta)</p>                                                                                                                                                                                                                                                                                                                                            |
| Mast Cell Stabilizers       | <p><b>Route: Inhaled, nebulized</b><br/>                     Cromolyn sodium, cromoglycate (Intal)<br/>                     Nedocromil (Tilade)</p>                                                                                                                                                                                                                                                                                                                                                                              |
| Inhaled Corticosteroids     | <p><b>Route: inhaled</b><br/>                     Beclomethasone propionate (QVAR)<br/>                     Budesonide (Pulmicort Turbuhaler, Pulmicort Flexhaler, Pulmicort Respules)<br/>                     Ciclesonide (Alvesco)<br/>                     Flunisolide (Aerobid, Aerobid-M, Aerospan 80)<br/>                     Fluticasone propionate (Flovent HFA, Flovent Diskus)<br/>                     Mometasone (Asmanex HFA, Asmanex Twisthaler)<br/>                     Triamcinolone acetonide (Azmacort)</p> |

|                                                          |                                                                                                                                                                                                                                                 |
|----------------------------------------------------------|-------------------------------------------------------------------------------------------------------------------------------------------------------------------------------------------------------------------------------------------------|
| <p>Inhaled Corticosteroid + Long-Acting Beta Agonist</p> | <p><b>Route: Inhaled</b><br/> Budesonide-Formoterol (Symbicort HFA)<br/> Fluticasone furoate + Vilanterol (Breo Ellipta)<br/> Fluticasone-salmeterol (Advair HFA, Advair Diskus, AirDuo Respiclick)<br/> Mometasone-formoterol (Dulera HFA)</p> |
| <p>Leukotriene Antagonists (LTA)</p>                     | <p><b>Route: Oral (PO)</b><br/> Montelukast (Singulair)<br/> Zafirlukast (Accolate)<br/> Zileuton (Zyflo, Zyflo CR)</p>                                                                                                                         |
| <p>Biologics</p>                                         | <p>Benralizumab (Fasenra)<br/> Dupilumab (Dupixent)<br/> Mepolizumab (Nucala)<br/> Omalizumab (Xolair)<br/> Reslizumab (Cinqair)</p>                                                                                                            |

**Appendix Table 3.** Chicago and PheKB Exclusion Criteria Diagnoses

| <b>Exclusion Criteria - Chicago Algorithm</b>           |        |                                                                                                                                                                                   |
|---------------------------------------------------------|--------|-----------------------------------------------------------------------------------------------------------------------------------------------------------------------------------|
| Cancers of the airways and thorax                       | ICD-9  | 160.xx to 165.xx                                                                                                                                                                  |
|                                                         | ICD-10 | C30.** to C39.*                                                                                                                                                                   |
| Secondary malignancy of the respiratory system          | ICD-9  | 197.0 to 197.3                                                                                                                                                                    |
|                                                         | ICD-10 | C78.**                                                                                                                                                                            |
| Malignancy of lymphatic and hematopoietic systems       | ICD-9  | 200.xx to 208.xx                                                                                                                                                                  |
|                                                         | ICD-10 | C81.88 to C96.**                                                                                                                                                                  |
| Benign neoplasm of the bronchus and lung                | ICD-9  | 212.3                                                                                                                                                                             |
|                                                         | ICD-10 | D14.30                                                                                                                                                                            |
| Human immunodeficiency virus HIV disease                | ICD-9  | 042                                                                                                                                                                               |
|                                                         | ICD-10 | B20.**                                                                                                                                                                            |
| Retrovirus infections                                   | ICD-9  | 079.5x                                                                                                                                                                            |
|                                                         | ICD-10 | B97.3                                                                                                                                                                             |
| Asymptomatic and serologic HIV infection                | ICD-9  | V08, 795.71                                                                                                                                                                       |
|                                                         | ICD-10 | Z21 and R75                                                                                                                                                                       |
| Alpha 1-antitrypsin deficiency                          | ICD-9  | 273.4                                                                                                                                                                             |
|                                                         | ICD-10 | E88.01                                                                                                                                                                            |
| Cystic fibrosis and other metabolic disorders           | ICD-9  | 277.xx, V77.6, V83.81                                                                                                                                                             |
|                                                         | ICD-10 | E84.*, Z13.228                                                                                                                                                                    |
| Acute pulmonary heart disease (cor pulmonale, embolism) | ICD-9  | 415.x                                                                                                                                                                             |
|                                                         | ICD-10 | I00.* to I02.**, I05.** to I09.**, I10.** to I16.**, I20.** to I25.**, I26.** to I28.**, I30.** to I52.**, I60.** to I69.**, I70.** to I79.**, I80.** to I89.**, I95.** to I99.** |
| Chronic pulmonary heart disease                         | ICD-9  | 416.x                                                                                                                                                                             |
|                                                         | ICD-10 | I00.* to I02.**, I05.** to I09.**, I10.** to I16.**, I20.** to I25.**, I26.** to I28.**, I30.** to I52.**, I60.** to I69.**, I70.** to I79.**, I80.** to I89.**, I95.** to I99.** |
| Paralysis of vocal cord or larynx                       | ICD-9  | 478.3x                                                                                                                                                                            |
|                                                         | ICD-10 | J38.00, J38.01, J38.02                                                                                                                                                            |
| Other diseases of vocal cords (vocal cord dysfunction)  | ICD-9  | 478.5                                                                                                                                                                             |
|                                                         | ICD-10 | J38.3                                                                                                                                                                             |
| Chronic obstructive pulmonary disease (COPD)            | ICD-9  | 491.xx, 496                                                                                                                                                                       |

|                                                             |        |                                                                                                                                     |
|-------------------------------------------------------------|--------|-------------------------------------------------------------------------------------------------------------------------------------|
|                                                             | ICD-10 | J41.0, J41.1, J44.9, J44.1, J44.0, J41.8, J42                                                                                       |
| Emphysema                                                   | ICD-9  | 492.x                                                                                                                               |
|                                                             | ICD-10 | J43.9                                                                                                                               |
| Bronchiectasis                                              | ICD-9  | 494.xx                                                                                                                              |
|                                                             | ICD-10 | J47.9                                                                                                                               |
| Extrinsic allergic alveolitis                               | ICD-9  | 495.x                                                                                                                               |
|                                                             | ICD-10 | J47.1                                                                                                                               |
| Pneumoconioses and post-radiation lung disease              | ICD-9  | 500.x - 508.x                                                                                                                       |
|                                                             | ICD-10 | J61, J62.8, J63.*, J66.*, J64, J68.*, J69.*, J70.*                                                                                  |
| Malignant pleural effusion                                  | ICD-9  | 511.81                                                                                                                              |
|                                                             | ICD-10 | J91.0                                                                                                                               |
| Pulmonary fibrosis                                          | ICD-9  | 515                                                                                                                                 |
|                                                             | ICD-10 | J84.10, J84.89                                                                                                                      |
| Other alveolar and parietoalveolar pneumonopathy            | ICD-9  | 516.x                                                                                                                               |
|                                                             | ICD-10 | J84.*                                                                                                                               |
| Lung involvement in conditions declassified elsewhere       | ICD-9  | 517.x                                                                                                                               |
|                                                             | ICD-10 | J17, M34.81, J99                                                                                                                    |
| Allergic bronchopulmonary aspergillosis                     | ICD-9  | 518.6                                                                                                                               |
|                                                             | ICD-10 | B44.81                                                                                                                              |
| Disorders of diaphragm                                      | ICD-9  | 519.4                                                                                                                               |
|                                                             | ICD-10 | J98.6                                                                                                                               |
| Congenital abnormalities of lower airways and lungs         | ICD-9  | 748.2 to 748.9                                                                                                                      |
|                                                             | ICD-10 | Q31.0, Q31.1, Q31.3, Q31.8, Q32.1, Q32.4, Q33.0, Q33.2, Q33.3, Q33.6, Q33.9, Q33.4, Q33.1, Q33.5, Q33.8, Q34.0, Q34.1, Q34.8, Q34.9 |
| Respiratory distress syndrome                               | ICD-9  | 769.xx                                                                                                                              |
|                                                             | ICD-10 | P22.0                                                                                                                               |
| Chronic bronchitis and emphysema                            | ICD-9  | V81.3                                                                                                                               |
|                                                             | ICD-10 | Z13.83                                                                                                                              |
| Bronchopulmonary dysplasia                                  | ICD-9  | 770.7                                                                                                                               |
|                                                             | ICD-10 | P27.0, P27.1, P27.8                                                                                                                 |
| Prematurity (born <35 weeks), 765.28 and 765.29 are allowed | ICD-9  | 765.21 to 765.27                                                                                                                    |
|                                                             | ICD-10 | P07.21, P07.22, P07.23, P07.24, P07.26, P07.31, P07.32, P07.33, P07.34, P07.35, P07.36, P07.37                                      |
| Aspiration syndrome/foreign body                            | ICD-9  | 934.8                                                                                                                               |

|                                                               |        |                                                                                    |
|---------------------------------------------------------------|--------|------------------------------------------------------------------------------------|
|                                                               | ICD-10 | T17.800A, T17.808A, T17.810A, T17.818A, T17.820A, T17.828A, T17.890A, T17.898A     |
| Post-transplant lymphoproliferative disorder (PTLD)           | ICD-9  | 238.77                                                                             |
|                                                               | ICD-10 | D47.Z1                                                                             |
| Systemic lupus erythematosus, scleroderma, dermatomyositis    | ICD-9  | 710.x                                                                              |
|                                                               | ICD-10 | M32.10, M34.0, M34.1, M34.9, M35.00, M35.01, M33.90, M33.20, M35.8, M35.5, M35.9   |
| Rheumatoid arthritis and other inflammatory polyarthropathies | ICD-9  | 714.x                                                                              |
|                                                               | ICD-10 | M06.9, M05.00, M05.30, M05.60, M06.1, M08.00, M08.3, M08.40, M12.00, M05.10, M06.4 |
| Complications of transplanted organ                           | ICD-9  | 996.8x                                                                             |
|                                                               | ICD-10 | T86.*                                                                              |
| Surgical operation with transplant of whole organ             | ICD-9  | E878.0                                                                             |
|                                                               | ICD-10 | Y83.0                                                                              |
| Organ or tissue replaced by transplant                        | ICD-9  | V42.x                                                                              |
|                                                               | ICD-10 | Z94.*, Z95.*                                                                       |
| Awaiting organ transplant status                              | ICD-9  | V49.83                                                                             |
|                                                               | ICD-10 | Z76.82                                                                             |
| Aftercare following organ transplant                          | ICD-9  | V58.44                                                                             |
|                                                               | ICD-10 | Z48.298                                                                            |
| Cerebral palsy                                                | ICD-9  | 343.x                                                                              |
|                                                               | ICD-10 | G80.*                                                                              |
| Spinal muscular atrophy and other motor neuron diseases       | ICD-9  | 335.x                                                                              |
|                                                               | ICD-10 | G12.*                                                                              |
| Muscular dystrophies and other myopathies                     | ICD-9  | 359.x                                                                              |
|                                                               | ICD-10 | G72.*, G73.*                                                                       |
| Heart failure                                                 | ICD-9  | 428.x                                                                              |
|                                                               | ICD-10 | I50.*                                                                              |
| <b>Exclusion Criteria from PheKB</b>                          |        |                                                                                    |
| Vocal cord dysfunction                                        | ICD-9  | 478.3**                                                                            |
|                                                               | ICD-10 | J38.00, J38.01, J38.02                                                             |
| Post-transplant lymphoproliferative disorder (PTLD)           | ICD-9  | 238.77                                                                             |
|                                                               | ICD-10 | D47.Z1                                                                             |
| Cystic fibrosis and other metabolic disorders                 | ICD-9  | 277.**                                                                             |
|                                                               | ICD-10 | E84.*, Z13.228, Z14.1                                                              |
| Bronchitis, emphysema                                         | ICD-9  | 490-492.**, V81.3                                                                  |



|                                        |        |                                    |
|----------------------------------------|--------|------------------------------------|
|                                        | ICD-10 | Z13.83                             |
| Diseases of the respiratory system     | ICD-9  | 494-496.**                         |
|                                        | ICD-10 | J47.9, J67.* , J44.9               |
| Respiratory distress syndrome          | ICD-9  | 769.**                             |
|                                        | ICD-10 | P22.0                              |
| Organ or tissue replaced by transplant | ICD-9  | 996.8, E878.0, V42, V49.83, V58.44 |
|                                        | ICD-10 | T86.*                              |

ICD=International Classification of Diseases

**Appendix Table 4.** Details of errors and proposed solutions.

| Rules |                                       | Algorithm | Potential Error Reason                                                                                                                                                                                                                       | Potential Error Type | Proposed Solution                                                                                                                                                                                                                                                    |
|-------|---------------------------------------|-----------|----------------------------------------------------------------------------------------------------------------------------------------------------------------------------------------------------------------------------------------------|----------------------|----------------------------------------------------------------------------------------------------------------------------------------------------------------------------------------------------------------------------------------------------------------------|
| 1     | Visit 1: ICD asthma-related dx        | CAPriCORN | <ul style="list-style-type: none"> <li>• Diagnosis may be filed without a confirmatory note</li> <li>• Erroneous diagnosis filed</li> </ul>                                                                                                  | FP                   | <ul style="list-style-type: none"> <li>• Include "in-person" visits relevant to clinic, hospital, ER, urgent care</li> <li>• Include encounters after the EHR activated</li> <li>• Include encounters with associated notes</li> </ul>                               |
|       |                                       |           | <ul style="list-style-type: none"> <li>• Asthma not yet diagnosed</li> </ul>                                                                                                                                                                 | FN                   | <ul style="list-style-type: none"> <li>• Include broader asthma definition DRG</li> <li>• Stricter criteria of dx+med, with the addition of NLP/predictive analytics</li> </ul>                                                                                      |
|       | Visit 1: ICD asthma-related dx + med  | PheKB     | <ul style="list-style-type: none"> <li>• Diagnosis may exist without supporting documentation</li> <li>• Can be an erroneous diagnosis</li> <li>• Medication may not be current</li> </ul>                                                   | FP                   | <ul style="list-style-type: none"> <li>• Include "in-person" visits relevant to clinic, hospital, ER, urgent care</li> <li>• Include encounters after the EHR activated</li> <li>• Include encounters with associated notes</li> </ul>                               |
|       |                                       |           | <ul style="list-style-type: none"> <li>• Asthma not yet diagnosed</li> <li>• Medication filed on different date or location</li> </ul>                                                                                                       | FN                   | <ul style="list-style-type: none"> <li>• Include broader asthma definition DRG</li> <li>• NLP, Exploratory data/predictive analytics</li> </ul>                                                                                                                      |
| 2     | Visit 2: ICD asthma-related dx OR med | CAPriCORN | <ul style="list-style-type: none"> <li>• Diagnosis may be filed without a confirmatory note</li> <li>• Erroneous diagnosis filed</li> <li>• Medication may not be current</li> <li>• Second note may be part of the first illness</li> </ul> | FP                   | <ul style="list-style-type: none"> <li>• "In-person" visits relevant to clinic, hospital, ER, urgent care</li> <li>• Include encounters after the EHR activated</li> <li>• Include encounters with associated notes</li> <li>• Episodes &gt;1 month apart</li> </ul> |
|       |                                       |           | <ul style="list-style-type: none"> <li>• Only 1 note with confirmatory asthma history documented</li> <li>• Asthma not yet diagnosed</li> </ul>                                                                                              | FN                   | <ul style="list-style-type: none"> <li>• Include broader asthma definition DRG</li> <li>• NLP, Exploratory data/predictive analytics</li> </ul>                                                                                                                      |
|       | Visit 2: ICD asthma-related dx + med  | PheKB     | <ul style="list-style-type: none"> <li>• Diagnosis may be filed without a confirmatory note</li> <li>• Erroneous diagnosis filed</li> <li>• Medication may not be current</li> </ul>                                                         | FP                   | <ul style="list-style-type: none"> <li>• "In-person" visits relevant to clinic, hospital, ER, urgent care</li> <li>• Include encounters after the EHR activated</li> </ul>                                                                                           |

|   |                                                        |                    |                                                                                                                                                              |          |                                                                                                                                                 |
|---|--------------------------------------------------------|--------------------|--------------------------------------------------------------------------------------------------------------------------------------------------------------|----------|-------------------------------------------------------------------------------------------------------------------------------------------------|
|   |                                                        |                    | <ul style="list-style-type: none"> <li>• Second note may be part of the first illness</li> </ul>                                                             |          | <ul style="list-style-type: none"> <li>• Include encounters with associated notes</li> <li>• Episodes &gt;1 month apart</li> </ul>              |
|   |                                                        |                    | <ul style="list-style-type: none"> <li>• Asthma not yet diagnosed</li> <li>• Medication filed on different date or location</li> </ul>                       | FN       | <ul style="list-style-type: none"> <li>• Include broader asthma definition DRG</li> <li>• NLP, Exploratory data/predictive analytics</li> </ul> |
| 3 | Text: >=3 visits in 1 year with "wheezing" or "asthma" | PheKB              | <ul style="list-style-type: none"> <li>• Picks up those words in erroneous contexts (templates, FH, etc)</li> </ul>                                          | FP       | <ul style="list-style-type: none"> <li>• Text from HPI and Assessment/Plan only. Exclude negation, FH, templates, etc.</li> </ul>               |
|   |                                                        |                    | <ul style="list-style-type: none"> <li>• The timeframe of within 1 year may miss cases that have issues years apart (more mild, controlled cases)</li> </ul> | FN       | <ul style="list-style-type: none"> <li>• Expand timeframe to avoid missing intermittent asthma with infrequent exacerbations</li> </ul>         |
| 4 | Exclusion Criteria                                     | CAPriCORN<br>PheKB | <ul style="list-style-type: none"> <li>• Diagnoses that should be excluded</li> <li>• Unnecessary exclusion criteria</li> </ul>                              | FP<br>FN | See Appendix Table 5 for details                                                                                                                |

FP=false positive; FN=false negative; DRG=diagnosis-related group; ER=emergency room; EHR=electronic health record; NLP=natural language processing; dx=diagnosis; med=medication; HPI=history of present illness; FH=family history

**Appendix Table 5.** Chicago and PheKB Exclusion Criteria, Error Analysis

| <b>Exclusion criteria to potentially include - Chicago and PheKB algorithm</b>                                                                                                                                                                                                                                                                                                                                                                                                                  |
|-------------------------------------------------------------------------------------------------------------------------------------------------------------------------------------------------------------------------------------------------------------------------------------------------------------------------------------------------------------------------------------------------------------------------------------------------------------------------------------------------|
| Chiari malformation; cerebellar hypoplasia and related disorders; chronic fatigue syndrome; dysautonomia; Fabry disease; fibromyalgia; grey matter anomalies; hiatal hernia; hypotonia; immunodeficiency; inflammatory bowel disease; intractable seizure disorder; myasthenia gravis; nephrotic syndrome; pacemaker; pectus excavatum; periodic fever syndrome; postural orthostatic tachycardia syndrome; Prader-Willi syndrome; scoliosis; supraventricular tachycardia; Trisomy 21 Syndrome |
| <b>Exclusion criteria to potentially remove - CAPriCORN</b>                                                                                                                                                                                                                                                                                                                                                                                                                                     |
| Vocal cord dysfunction; disorders of the diaphragm; chronic respiratory disease arising in the perinatal period; other acute and subacute respiratory conditions due to fumes and vapors; foreign body in other specified parts of trachea bronchus and lung                                                                                                                                                                                                                                    |
| <b>Exclusion criteria to potentially remove – PheKB</b>                                                                                                                                                                                                                                                                                                                                                                                                                                         |
| Bronchitis and bronchitis not specified as acute or chronic                                                                                                                                                                                                                                                                                                                                                                                                                                     |
